# Supplementary material
Source: Springer Nature journal article supplement (https://www.springermedizin.de/resource/supplementary/12885_2013_4250_MOESM1_ESM.pdf/9467282)
Supplement: MOESM1 [file 9467282]

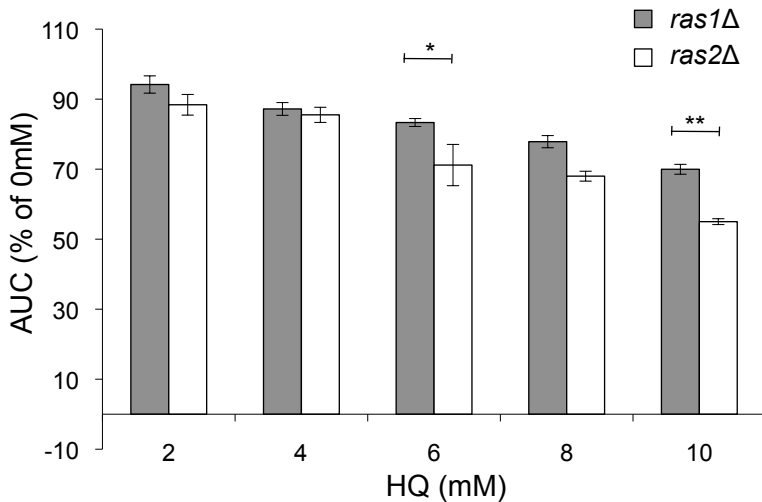

\*\* 0.001 < p < 0.01 ; \* 0.01 < p < 0.05

**Supplemental Figure 1. *ras2Δ* is significantly more sensitive to HQ than *ras1Δ*.** The Area Under Curve (AUC) was calculated for each strain after 24h of exposure to the indicated doses of HQ. The bars represent mean AUC as a percentage of the untreated for each strain with standard error of three replicates. Sensitivity was determined by comparison to the wild type strain (gray bars = *ras1Δ*; white bars = *ras2Δ*).
